# Supplementary material for: No Alterations of Brain Structural Asymmetry in Major Depressive Disorder: An ENIGMA Consortium Analysis
Source: Atypon-hosted journal article supplement (doi:10.1176/appi.ajp.2019.18101144), 2019-07-29

Figure S1a Histograms of individual asymmetry index values of subcortical volumes

**AI\_latVent**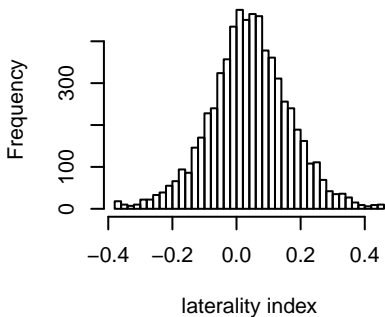**AI\_thal**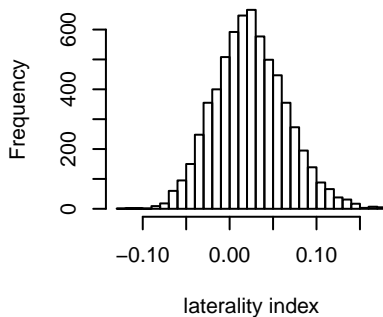**AI\_caud**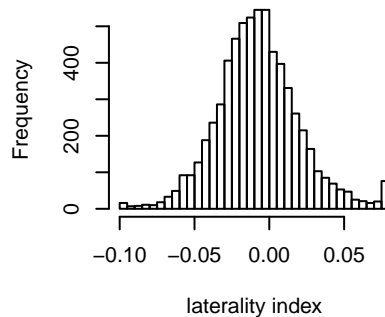**AI\_put**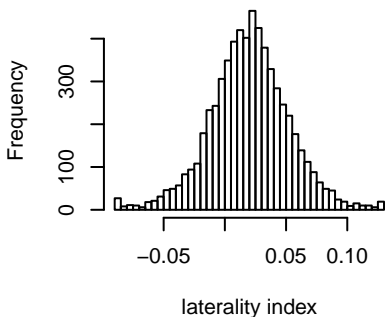**AI\_pal**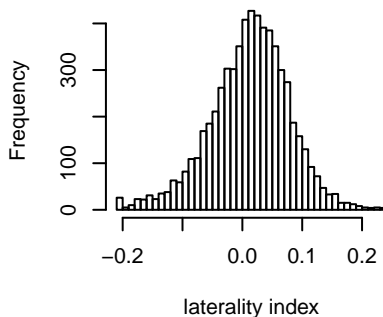**AI\_hippo**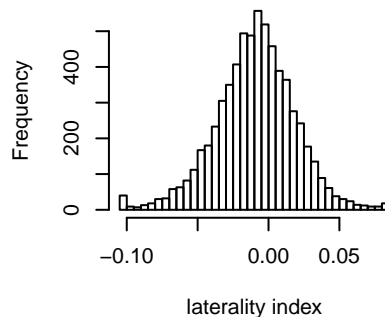**AI\_amyg**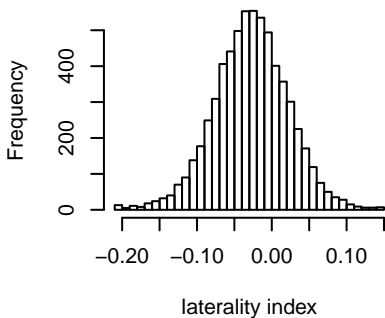**AI\_accumb**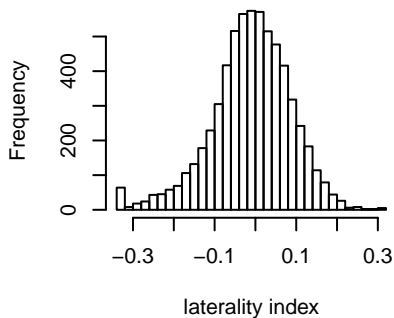

Figure S1b Histograms of individual asymmetry index values of cortical surface area

**AI\_bankssts**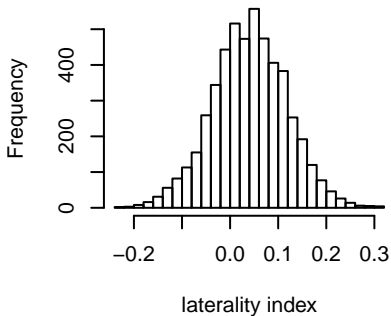**AI\_caudalanteriorcingulate**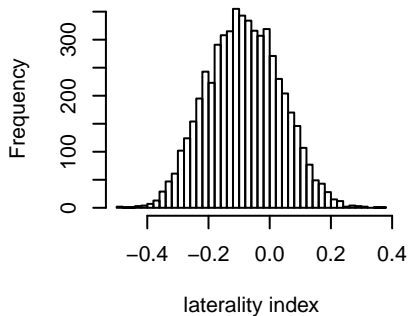**AI\_caudalmiddlefrontal**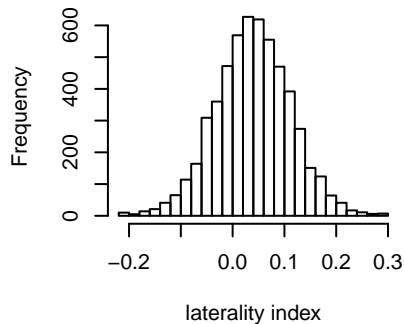**AI\_cuneus**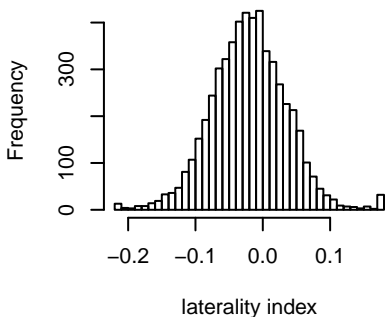**AI\_entorhinal**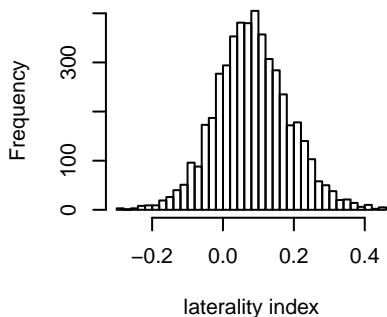**AI\_fusiform**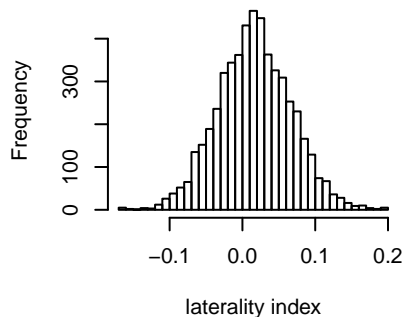**AI\_inferiorparietal**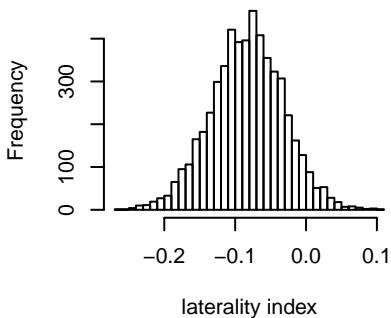**AI\_inferiortemporal**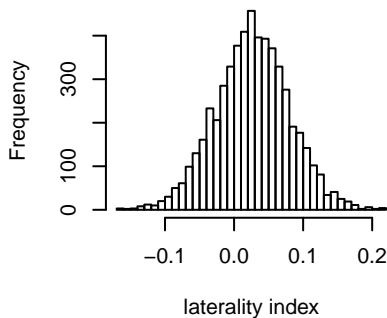**AI\_isthmuscingulate**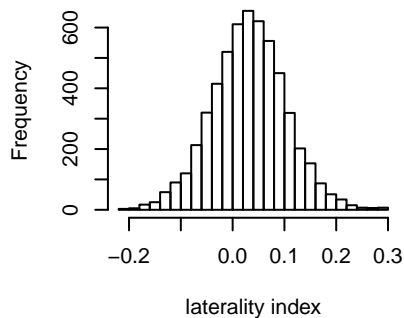

**AI\_lateraloccipital**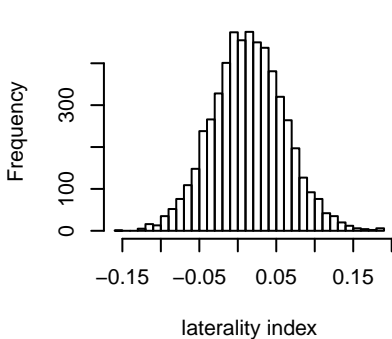**AI\_lateralorbitofrontal**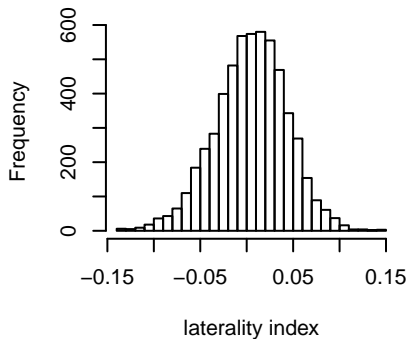**AI\_lingual**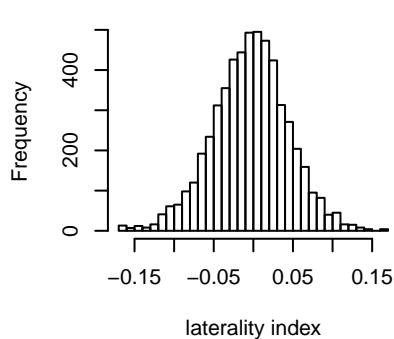**AI\_medialorbitofrontal**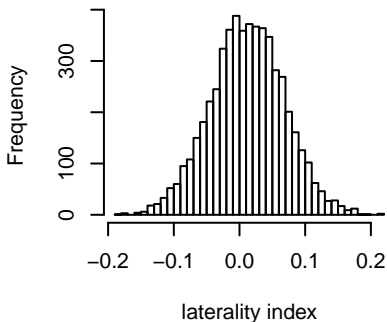**AI\_middletemporal**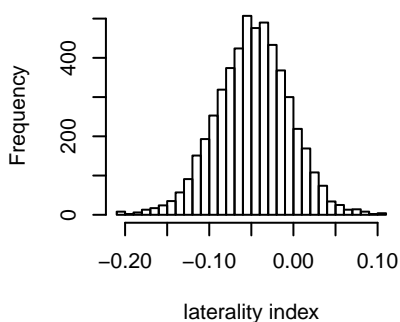**AI\_parahippocampal**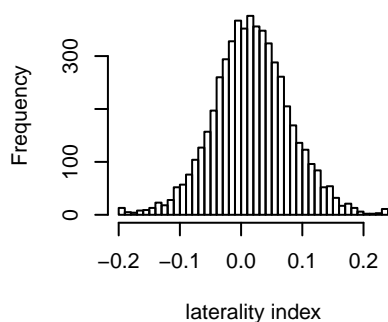**AI\_paracentral**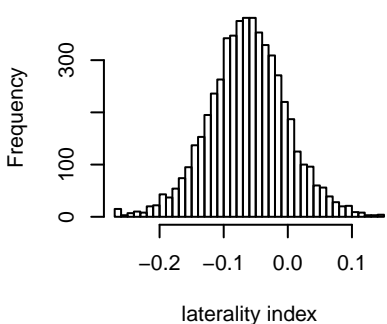**AI\_parsopercularis**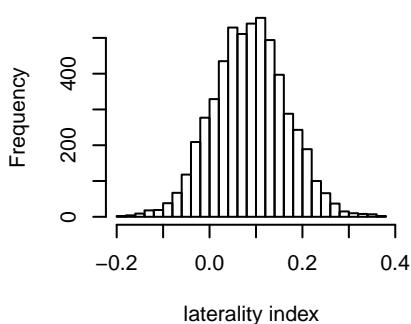**AI\_parsorbitalis**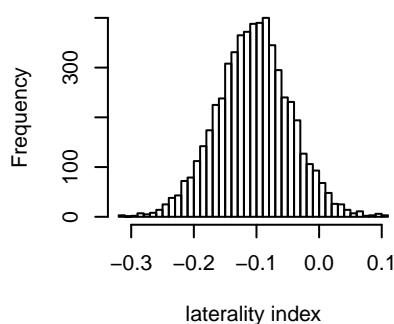

**AI\_parstriangularis**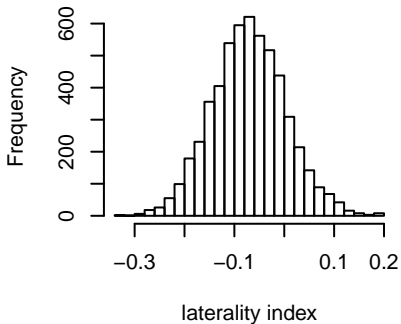**AI\_pericalcarine**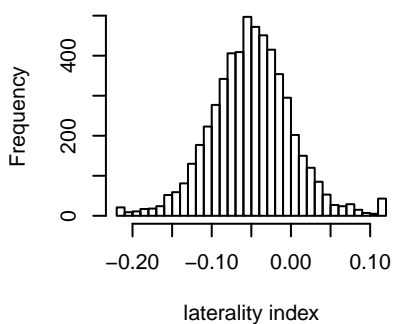**AI\_postcentral**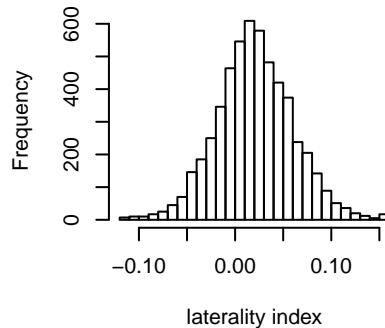**AI\_posteriorcingulate**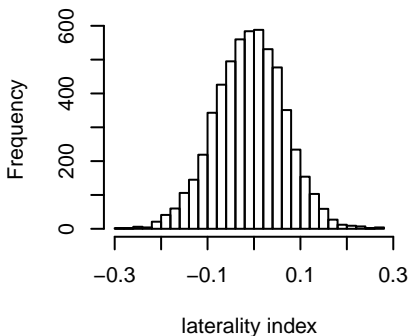**AI\_precentral**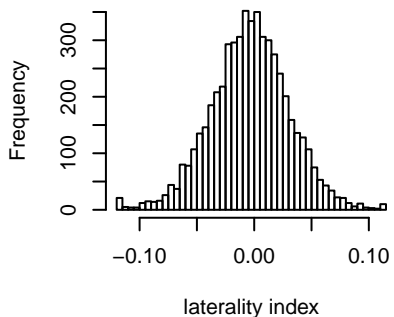**AI\_precuneus**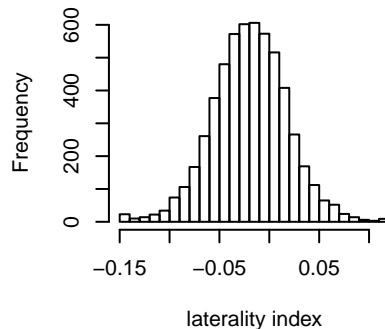**AI\_rostralanteriorcingulate**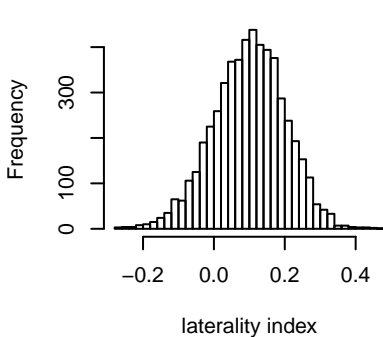**AI\_rostralmiddlefrontal**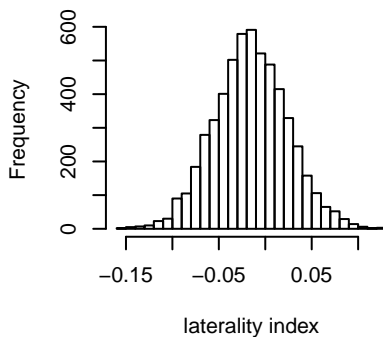**AI\_superiorfrontal**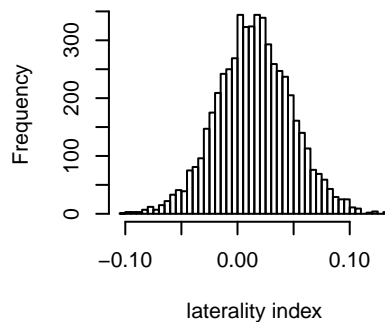

**AI\_superiorparietal**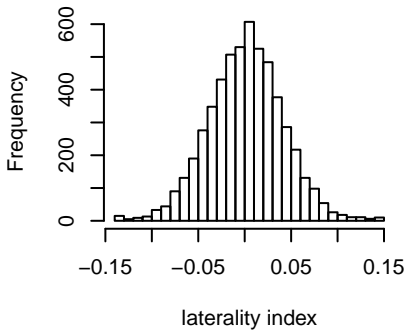**AI\_superiortemporal**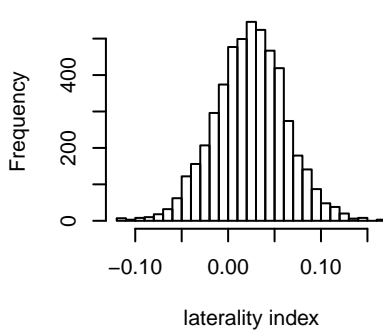**AI\_supramarginal**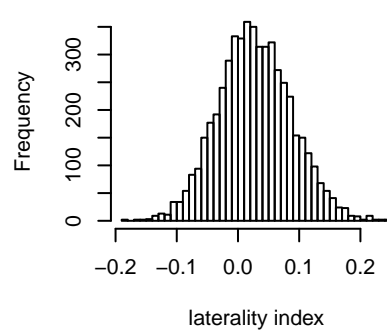**AI\_frontalpole**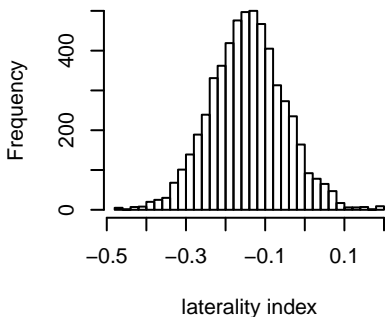**AI\_temporalpole**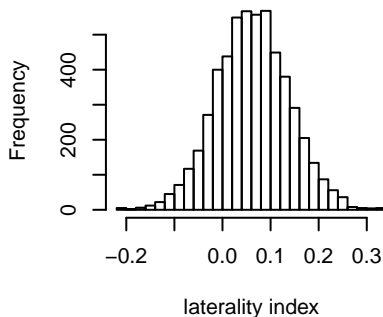**AI\_transversetemporal**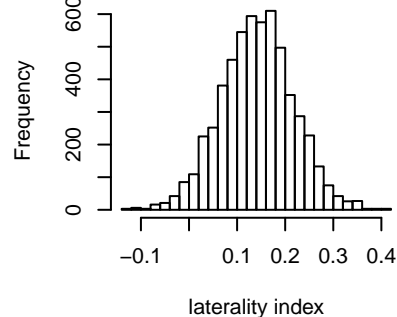**AI\_insula**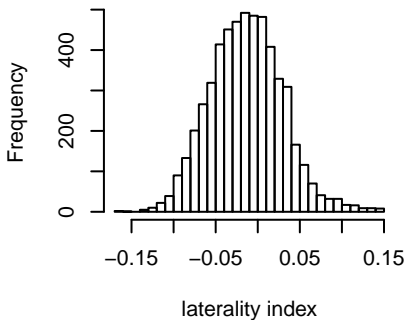**AI\_hemisphere**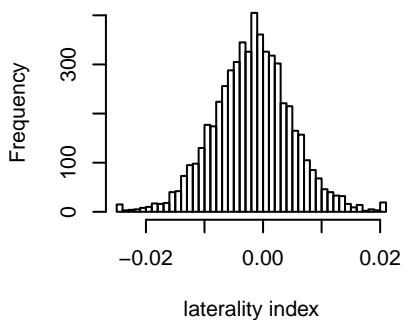

Figure S1c Histograms of individual asymmetry index values of cortical thickness



**AI\_bankssts**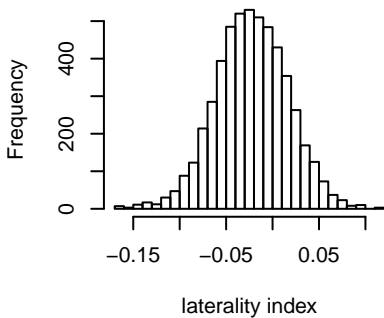**AI\_caudalanteriorcingulate**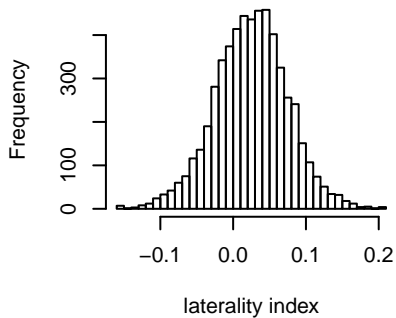**AI\_caudalmiddlefrontal**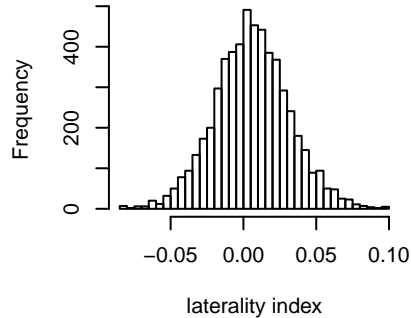**AI\_cuneus**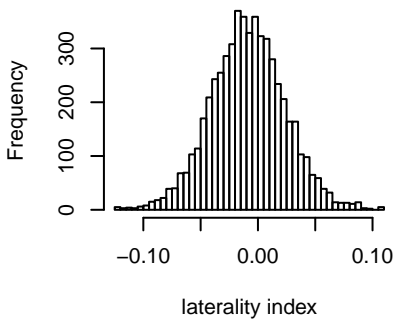**AI\_entorhinal**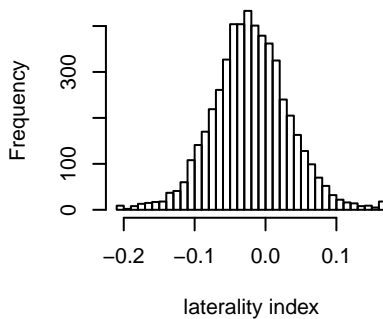**AI\_fusiform**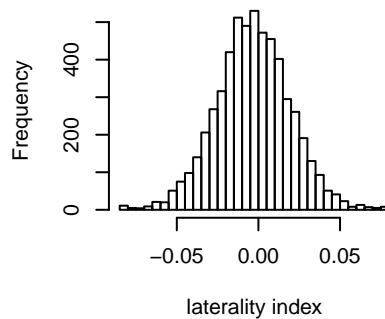**AI\_inferiorparietal**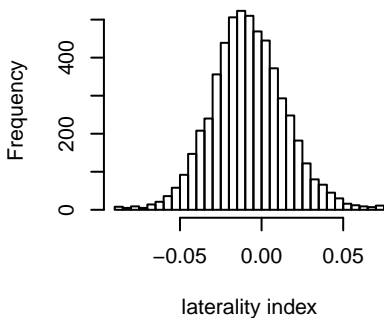**AI\_inferiortemporal**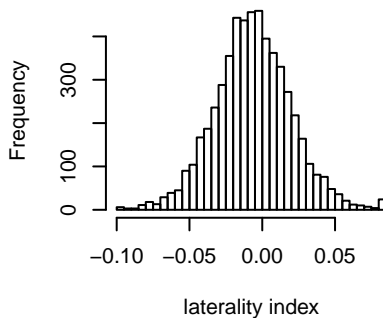**AI\_isthmuscingulate**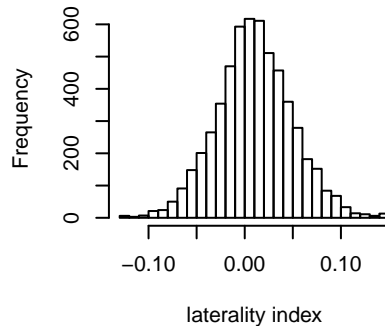

**AI\_lateraloccipital**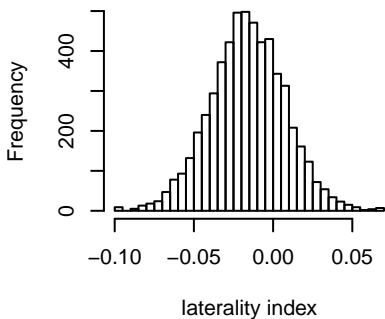**AI\_lateralorbitofrontal**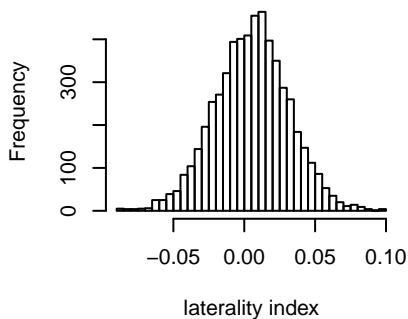**AI\_lingual**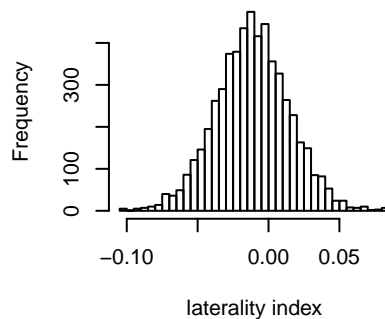**AI\_medialorbitofrontal**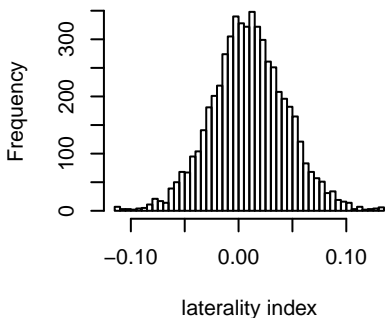**AI\_middletemporal**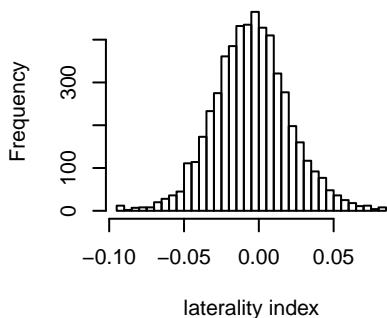**AI\_parahippocampal**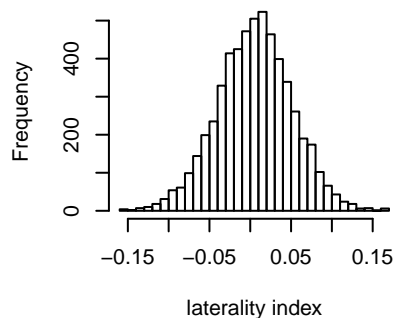**AI\_paracentral**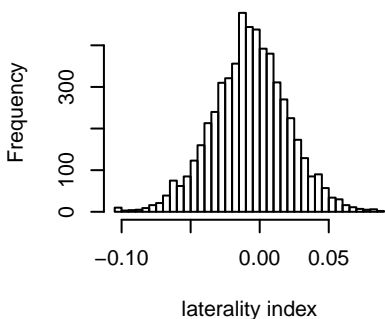**AI\_parsopercularis**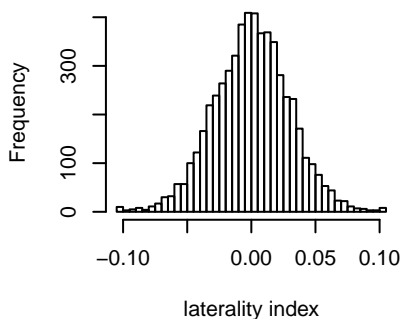**AI\_parsorbitalis**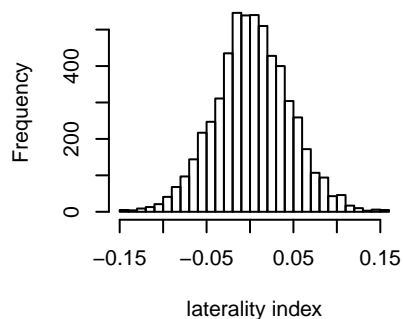

**AI\_parstriangularis**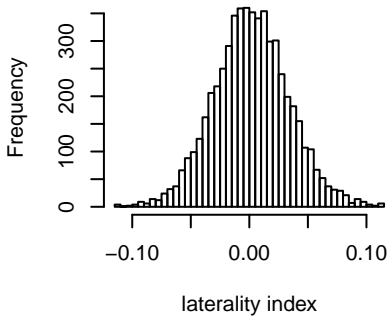**AI\_pericalcarine**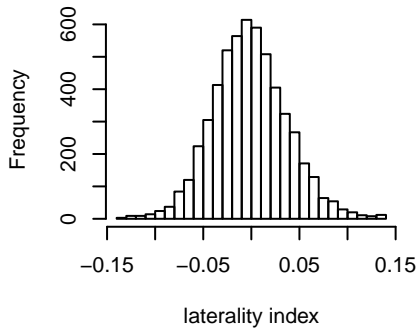**AI\_postcentral**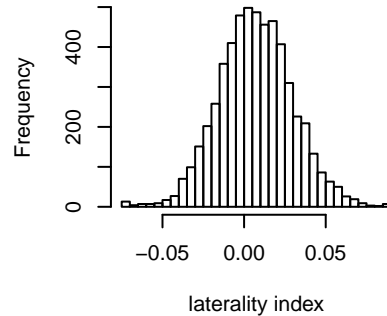**AI\_posteriorcingulate**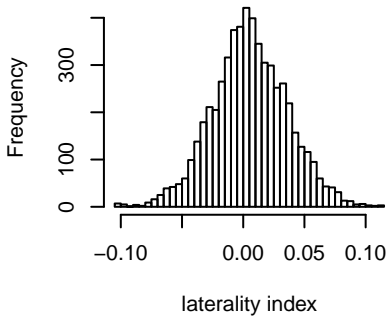**AI\_precentral**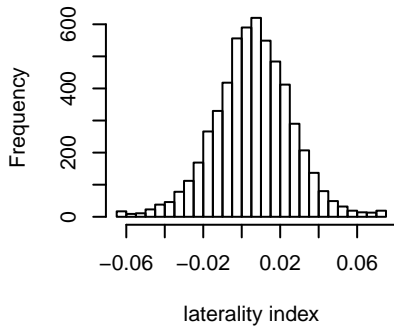**AI\_precuneus**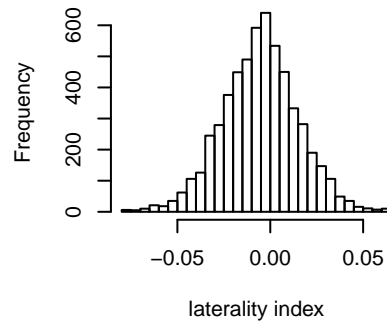**AI\_rostralanteriorcingulate**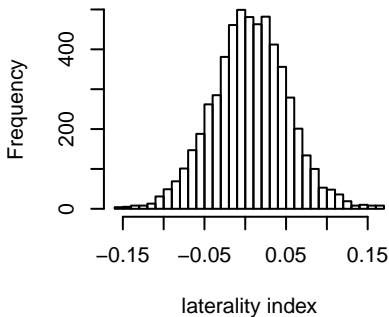**AI\_rostralmiddlefrontal**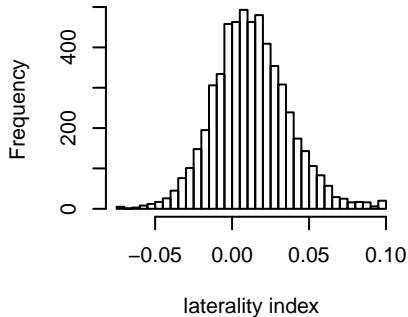**AI\_superiorfrontal**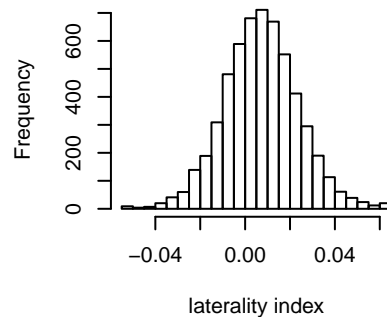

**AI\_superiorparietal**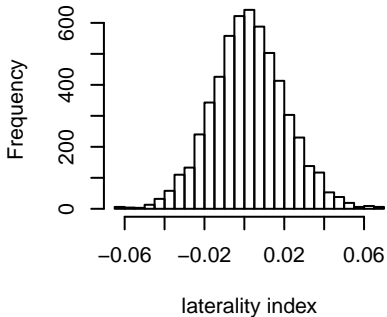**AI\_superiortemporal**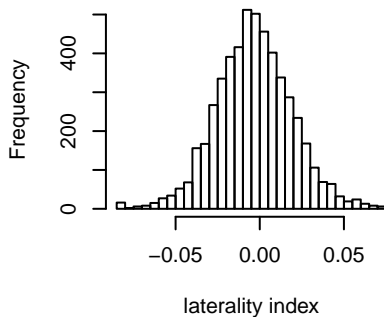**AI\_supramarginal**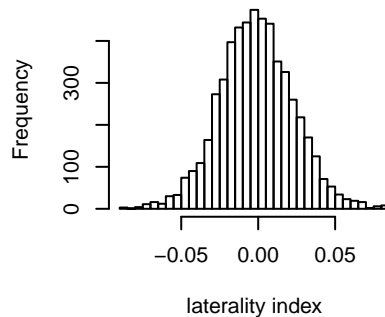**AI\_frontalpole**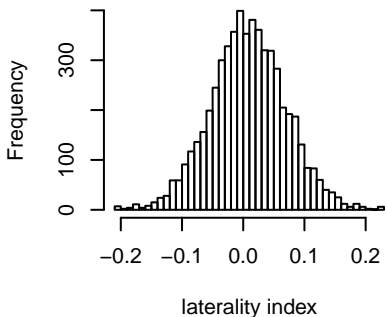**AI\_temporalpole**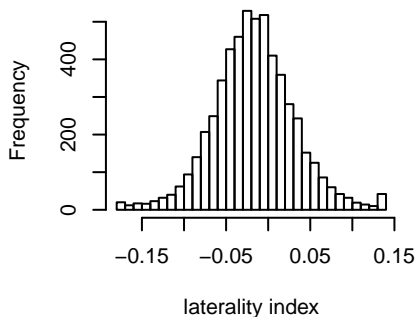**AI\_transversetemporal**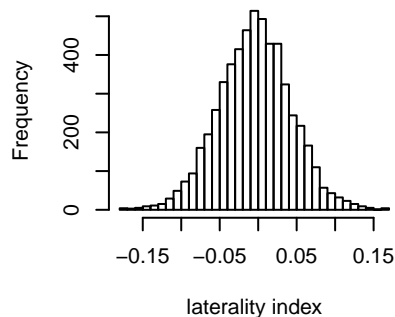**AI\_insula**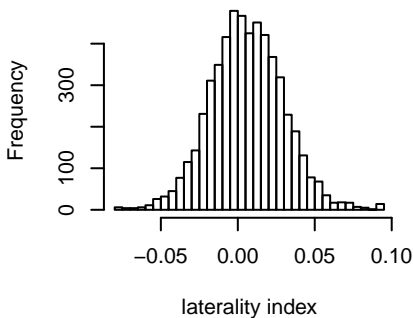**AI\_hemisphere**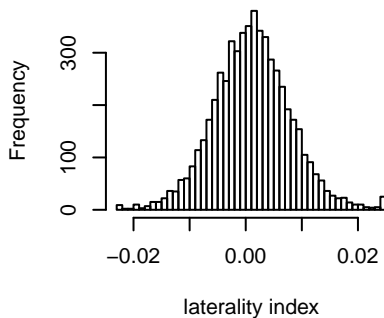

Supplement: appi.ajp.2019.18101144.ds002__FigureS1.pdf [file appi.ajp.2019.18101144.ds002__FigureS1.pdf]
